# Supplementary material for: Rational design of periodic porous titanium nitride MXene as a multifunctional catalytic membrane
Source: Royal Society of Chemistry journal article supplement (doi:10.1039/d3nr01647a), 2023-01-01
Supplement: d3nr01647a1.pdf [file d3nr01647a1.pdf]

## Supporting Information

### **Rational design of periodic porous Titanium Nitride MXene as multifunctional catalytic membrane**

Tianqi Zhang, Zhaojian Zheng, Hao Lu, Hao Liu, Guobo Chen, Shuwei Xia, Long  
Zhou\*, Meng Qiu\*

Key Laboratory of Marine Chemistry Theory and Technology (Ocean University of China), Ministry of Education,

Qingdao 266100, China

\*Correspondence and requests for materials should be addressed to drogonfly1988@126.com and

mengqiu@ouc.deu.cn

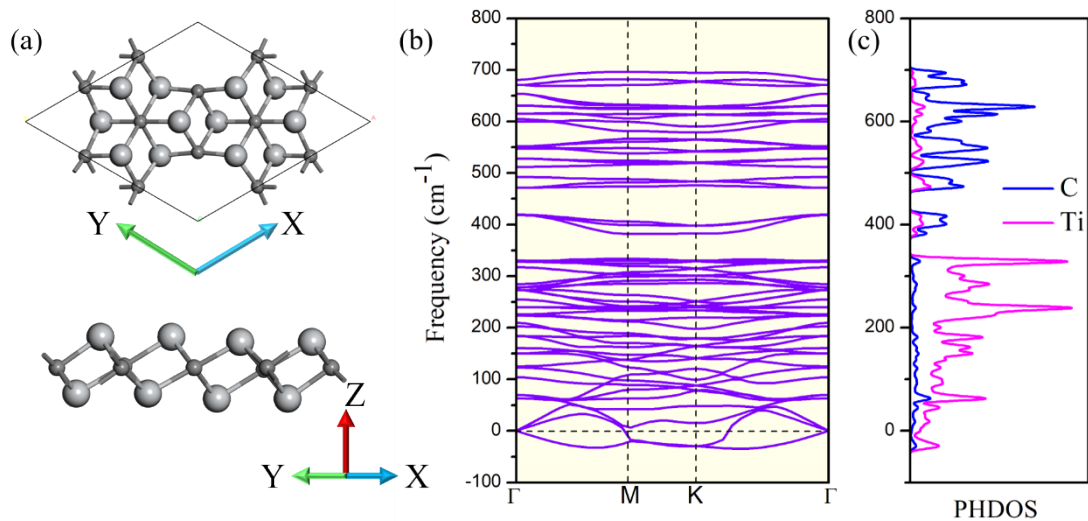

**Fig. S1** Top and side view of optimized  $\text{Ti}_{12}\text{C}_8$  (a), calculated phonon dispersion along the high symmetrical directions of the Brillouin zone (b) and the phonon PDOS (c). Little grey and big grey sphere represent carbon and titanium atom.

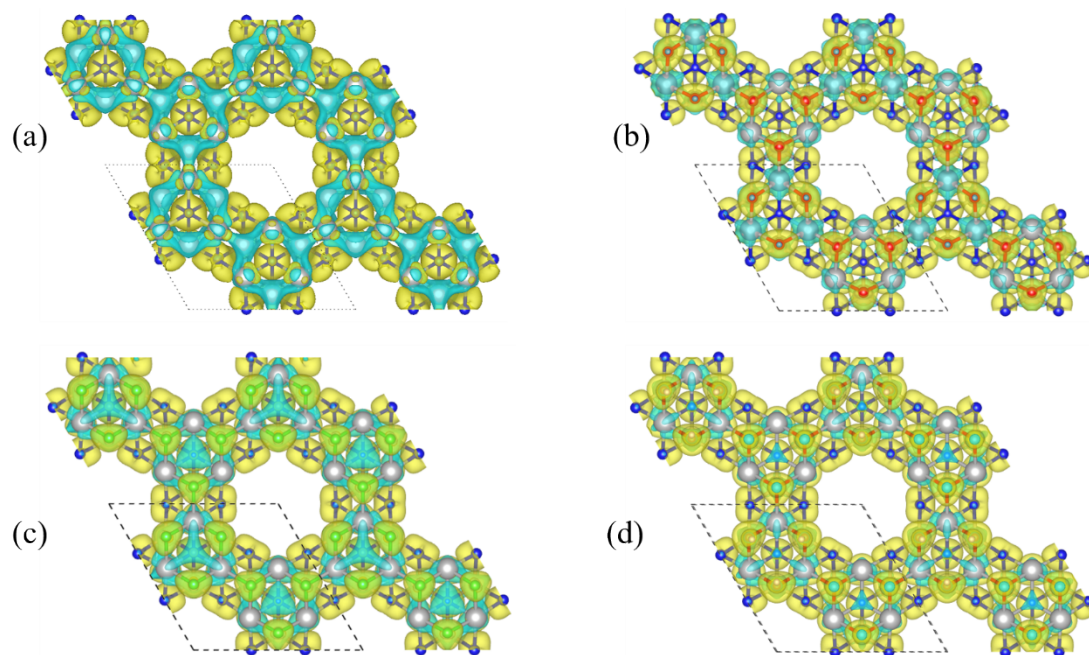

**Fig. S2** Charge density difference of (a)  $\text{Ti}_{12}\text{N}_8$ , (b)  $\text{Ti}_{12}\text{N}_8\text{O}_{12}$ , (c)  $\text{Ti}_{12}\text{N}_8\text{F}_{12}$  and (d)  $\text{Ti}_{12}\text{N}_8(\text{OH})_{12}$ . Yellow zones represent electron accumulation and cyan zones are electron deficiency, isovalue = 0.01 a.u.

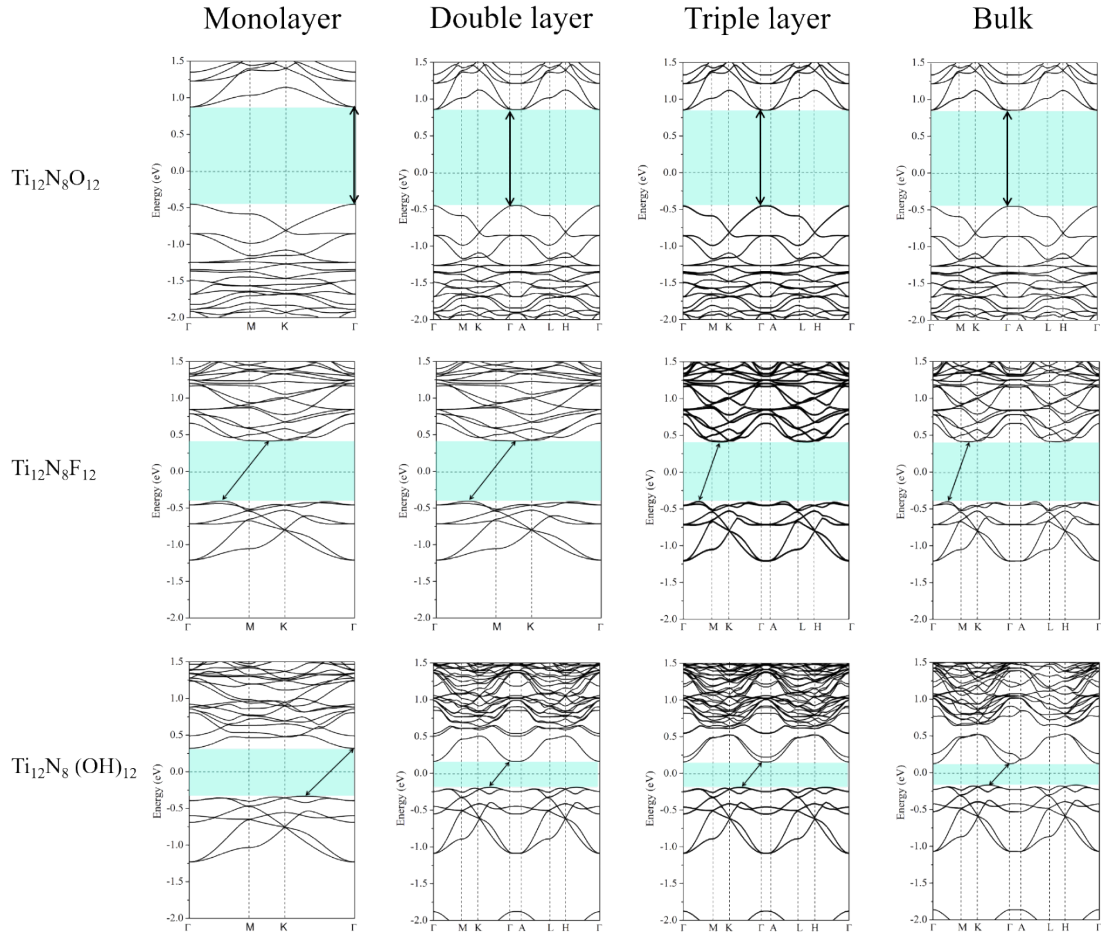

**Fig. S3** Calculated band structure of the monolayer, bi-layer, triple layer and bulk of  $\text{Ti}_{12}\text{N}_8\text{O}_{12}$ ,  $\text{Ti}_{12}\text{N}_8\text{F}_{12}$  and  $\text{Ti}_{12}\text{N}_8(\text{OH})_{12}$  by GGA/PBE

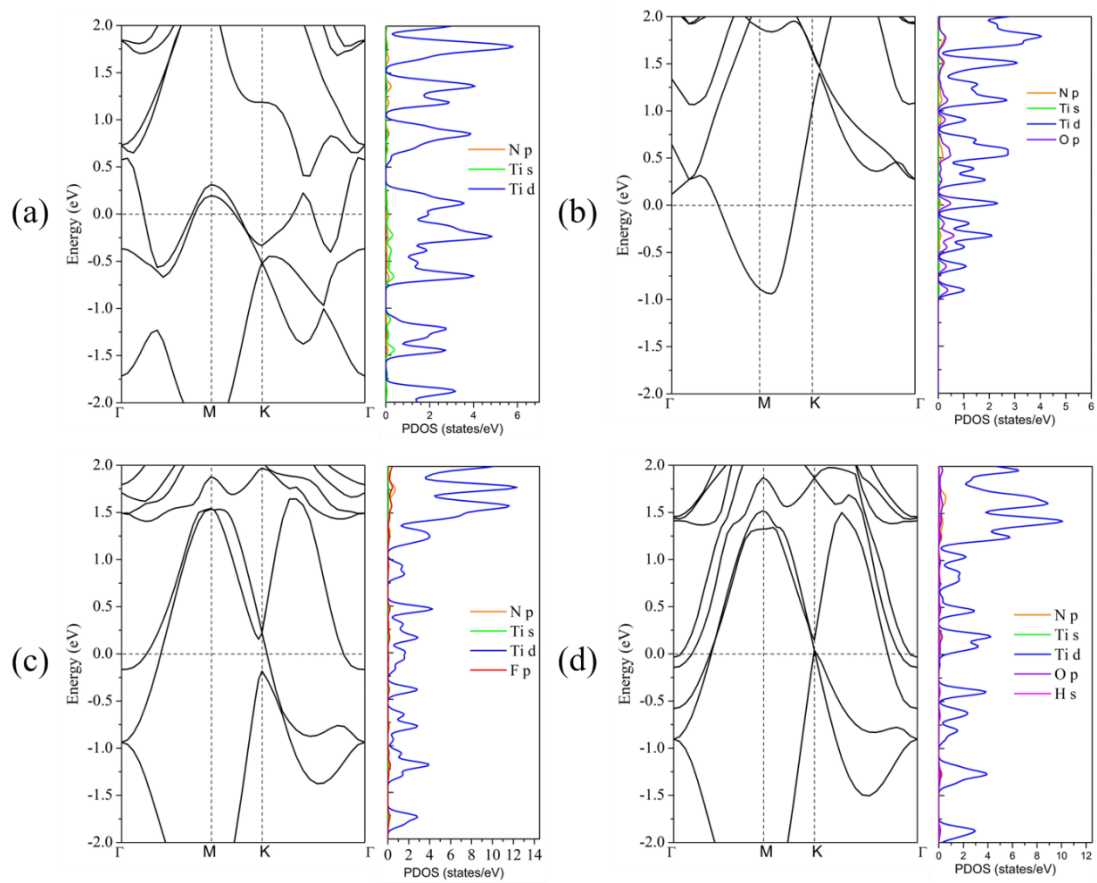

**Fig. S4** Band structure (left) and density of states (right) of (a)  $\text{Ti}_2\text{N}$ , (b)  $\text{Ti}_2\text{NO}_2$ , (c)  $\text{Ti}_2\text{NF}_2$  and (d)  $\text{Ti}_2\text{N}(\text{OH})_2$  under HSE06 theoretical level.

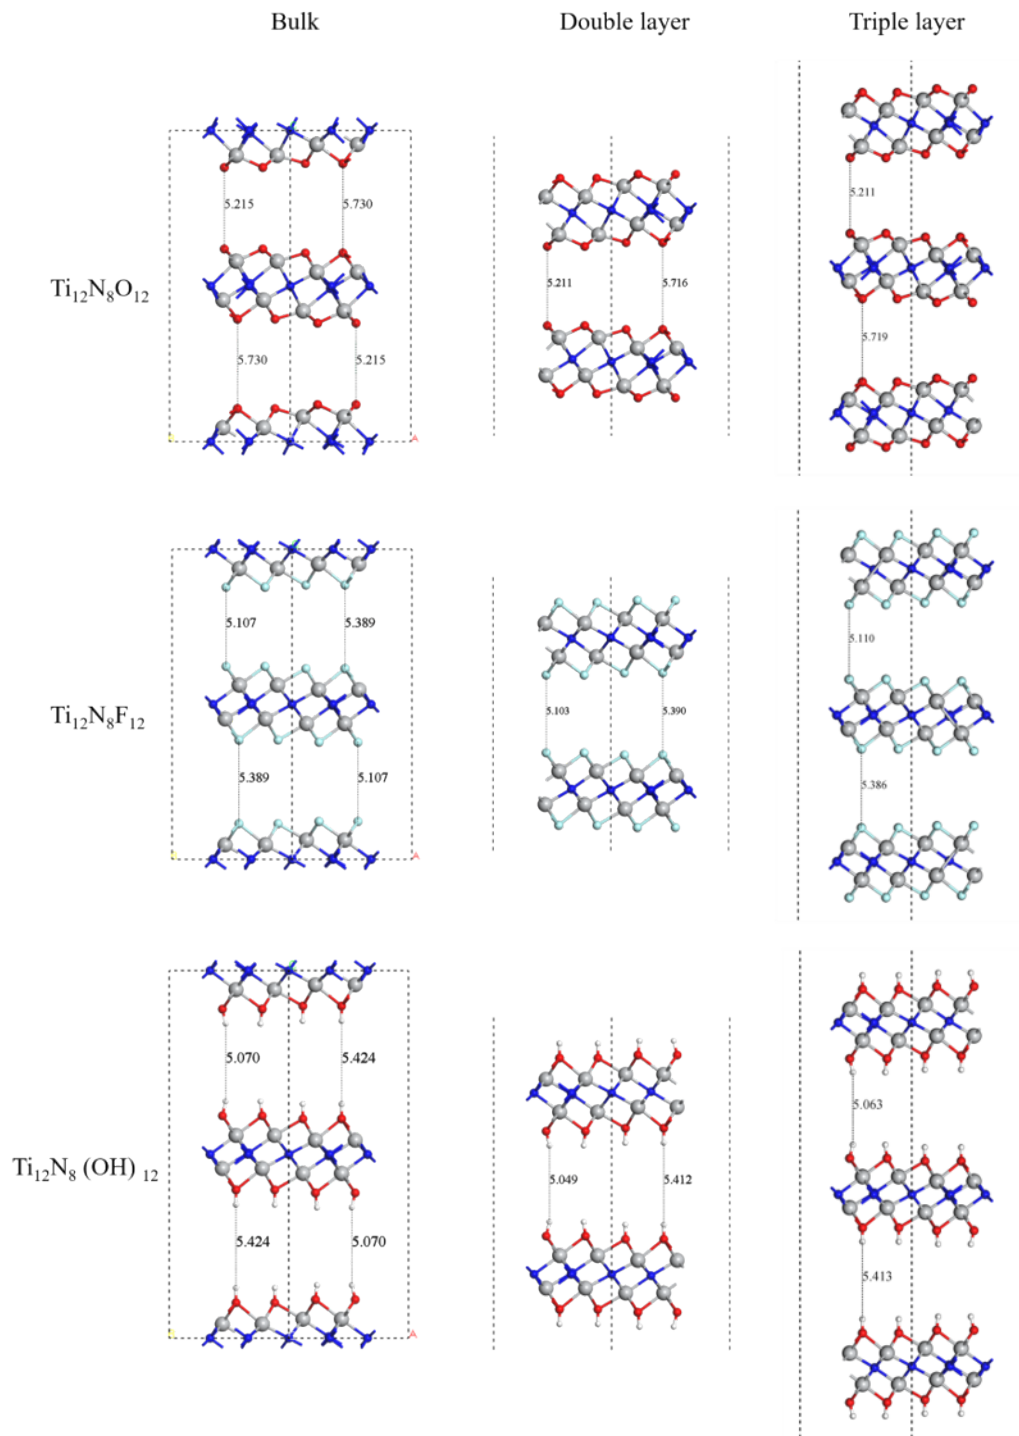

**Fig. S5** Snapshot of bulk, bi-layer and triple layered  $\text{Ti}_{12}\text{N}_8\text{O}_{12}$ ,  $\text{Ti}_{12}\text{N}_8\text{F}_{12}$  and  $\text{Ti}_{12}\text{N}_8(\text{OH})_{12}$ .

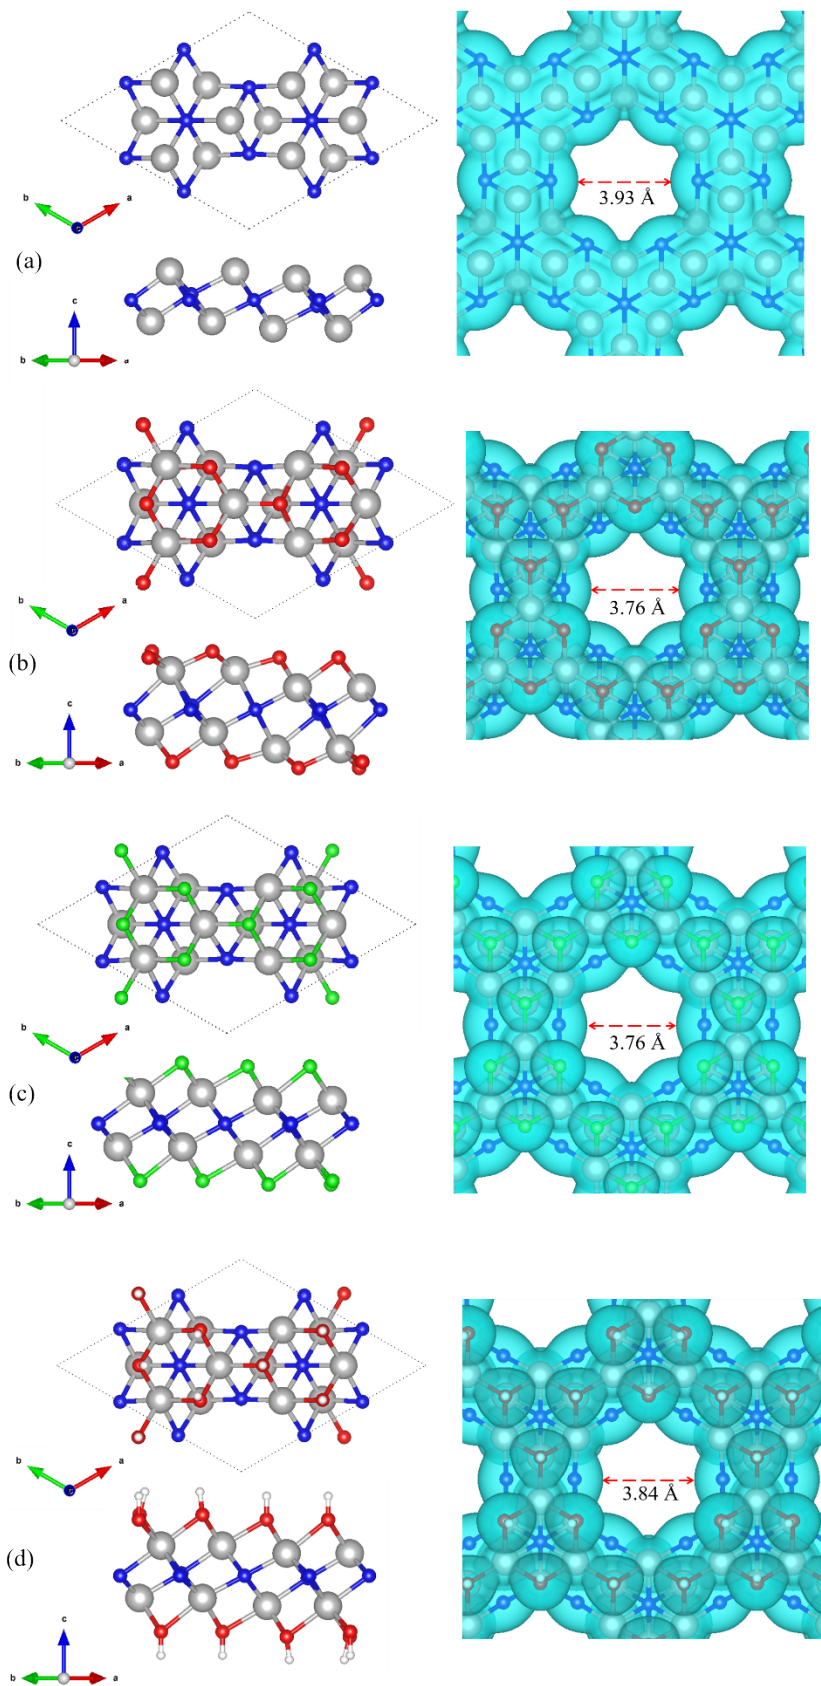

Fig.S6 Structure and electron density of (a)  $\text{Ti}_{12}\text{N}_8$ , (b)  $\text{Ti}_{12}\text{N}_8\text{O}_{12}$ , (c)  $\text{Ti}_{12}\text{N}_8\text{F}_{12}$  and (d)  $\text{Ti}_{12}\text{N}_8(\text{OH})_{12}$



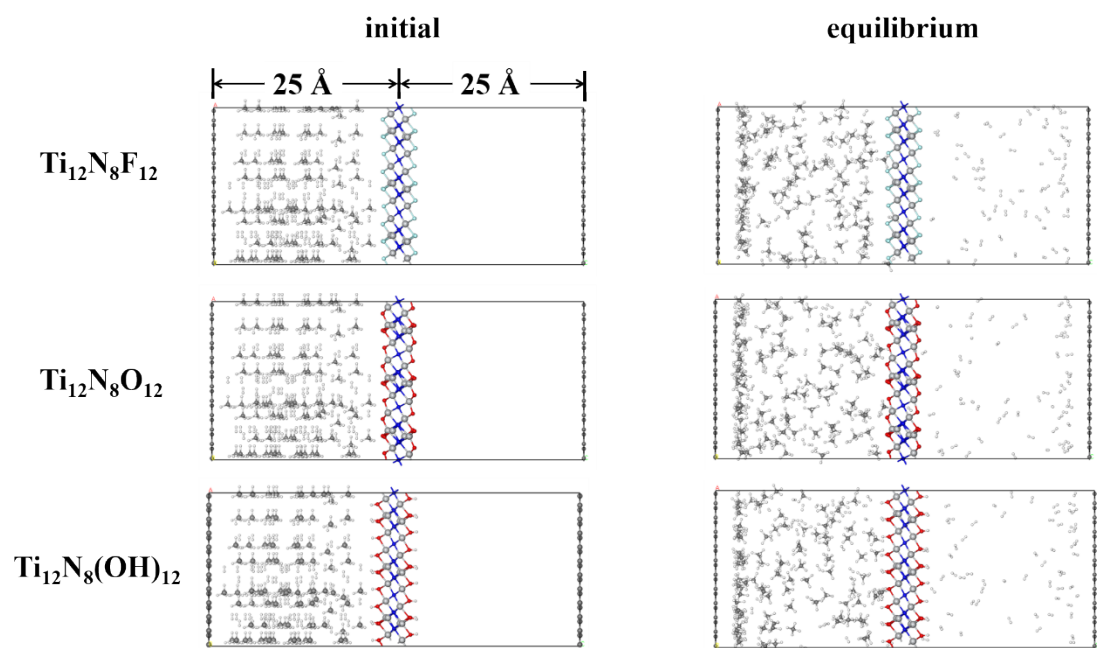

**Fig. S7** Snapshots of the equimolar  $\text{H}_2/\text{CH}_4$  mixed gases penmeating  $\text{Ti}_{12}\text{N}_8\text{T}_{12}$  before and after 20 ns MD simulations (C, gray; O red; H, white; N blue; F, cyan)



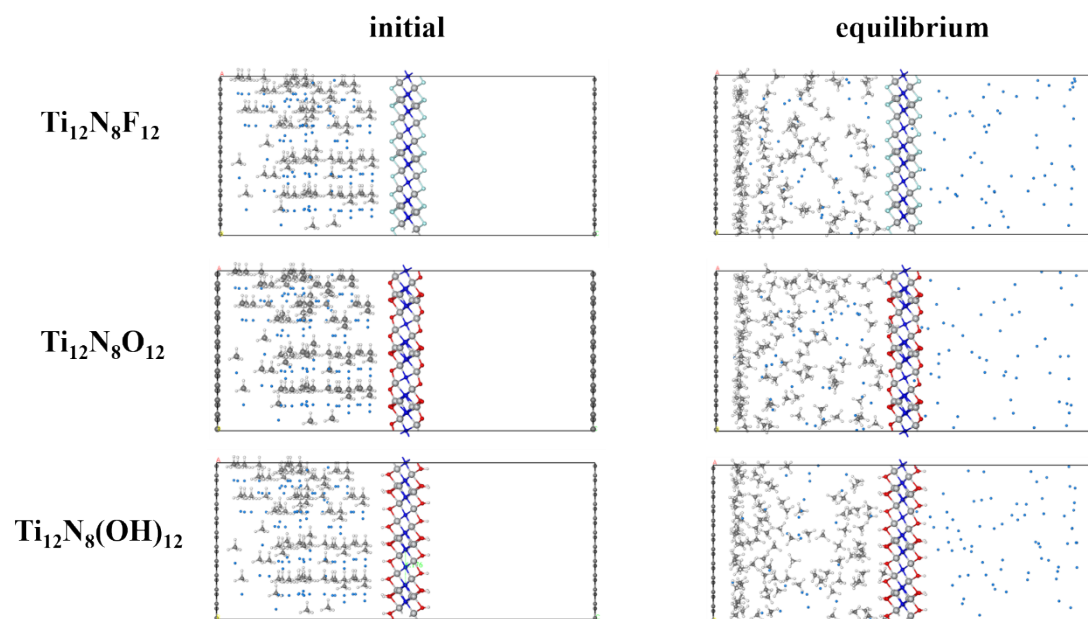

**Fig. S8** Snapshots of the equimolar He/CH<sub>4</sub> mixed gases penmeating Ti<sub>12</sub>N<sub>8</sub>T<sub>12</sub> before and after 20 ns MD simulations (C, gray; O red; H, white; N blue; F, cyan; He, light blue)

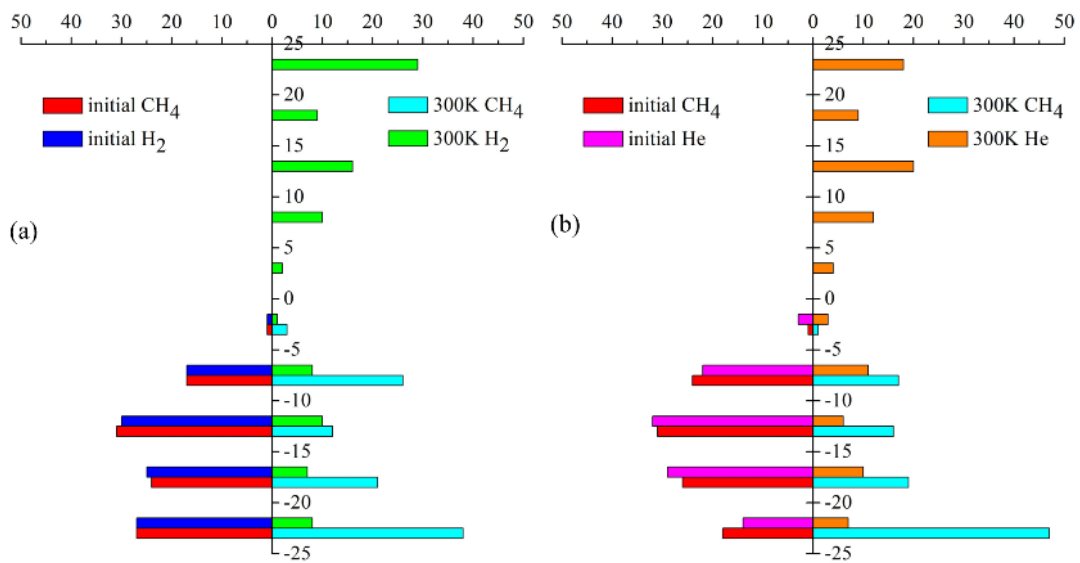

**Fig. S9** Distribution of gas molecules after 20 ns MD simulations upon  $Ti_{12}N_8F_{12}$

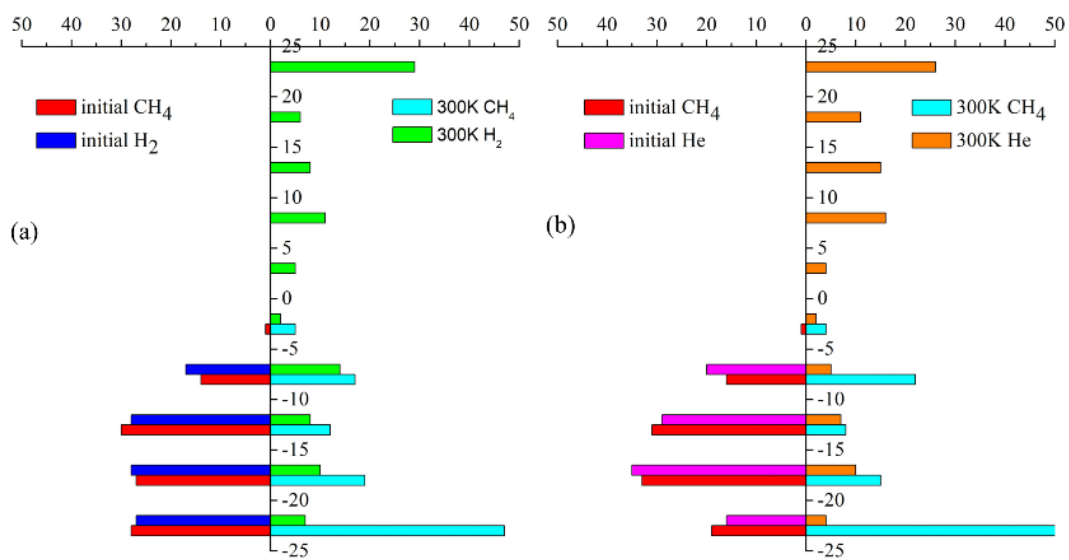

**Fig. S10** Distribution of gas molecules after 20 ns MD simulations upon  $\text{Ti}_{12}\text{N}_8(\text{OH})_{12}$

**Table S1** Bond lengths of porous MXene  $\text{Ti}_{12}\text{N}_8$  and  $\text{Ti}_{12}\text{N}_8\text{T}_{12}$  (T = O, F, OH)

|                                            | Bond length (Å)          |                          |                          |                          |                          |                          |                          |
|--------------------------------------------|--------------------------|--------------------------|--------------------------|--------------------------|--------------------------|--------------------------|--------------------------|
|                                            | $\text{N}_1\text{-Ti}_1$ | $\text{N}_1\text{-Ti}_3$ | $\text{N}_2\text{-Ti}_1$ | $\text{N}_2\text{-Ti}_3$ | $\text{T}_1\text{-Ti}_1$ | $\text{T}_2\text{-Ti}_2$ | $\text{T}_2\text{-Ti}_1$ |
| $\text{Ti}_2\text{N}$                      |                          | 2.070                    |                          |                          |                          | /                        |                          |
| $\text{Ti}_2\text{NO}_2$                   |                          | 2.148                    |                          |                          |                          | 1.980                    |                          |
| $\text{Ti}_2\text{NF}_2$                   |                          | 2.059                    |                          |                          |                          | 2.145                    |                          |
| $\text{Ti}_2\text{N(OH)}_2$                |                          | 2.084                    |                          |                          |                          | 2.166                    |                          |
| $\text{Ti}_{12}\text{N}_8$                 | 2.050                    | 2.045                    | 2.008                    | 1.974                    | /                        | /                        | /                        |
| $\text{Ti}_{12}\text{N}_8\text{O}_{12}$    | 2.256                    | 2.029                    | 2.282                    | 1.930                    | 1.874                    | 2.070                    | 1.865                    |
| $\text{Ti}_{12}\text{N}_8\text{F}_{12}$    | 2.022                    | 2.005                    | 2.104                    | 1.956                    | 2.050                    | 2.188                    | 2.117                    |
| $\text{Ti}_{12}\text{N}_8\text{(OH)}_{12}$ | 2.028                    | 2.012                    | 2.104                    | 1.968                    | 2.129                    | 2.208                    | 2.129                    |

**Table S2** Bond angle of porous MXene  $\text{Ti}_{12}\text{N}_8$  and  $\text{Ti}_{12}\text{N}_8\text{T}_{12}$  (T = O, F, OH)

| Bond angles ( $^\circ$ )             | $\text{Ti}_{12}\text{N}_8$ | $\text{Ti}_{12}\text{N}_8\text{O}_{12}$ | $\text{Ti}_{12}\text{N}_8\text{F}_{12}$ | $\text{Ti}_{12}\text{N}_8(\text{OH})_{12}$ |
|--------------------------------------|----------------------------|-----------------------------------------|-----------------------------------------|--------------------------------------------|
| $\text{Ti}_1\text{-N}_1\text{-Ti}_1$ | 100.5                      | 84.2                                    | 89.6                                    | 91.3                                       |
| $\text{Ti}_1\text{-N}_1\text{-Ti}_3$ | 83.4                       | 90.0                                    | 86.6                                    | 86.0                                       |
| $\text{N}_1\text{-Ti}_1\text{-N}_2$  | 94.6                       | 80.7                                    | 91.0                                    | 89.6                                       |
| $\text{N}_1\text{-Ti}_3\text{-N}_2$  | 95.2                       | 95.8                                    | 96.0                                    | 91.8                                       |
| $\text{Ti}_1\text{-N}_2\text{-Ti}_2$ | 96.8                       | 91.5                                    | 97.7                                    | 98.1                                       |
| $\text{Ti}_1\text{-N}_2\text{-Ti}_4$ | 91.6                       | 103.7                                   | 95.5                                    | 95.0                                       |
| $\text{N}_2\text{-Ti}_1\text{-N}_2$  | 88.4                       | 76.3                                    | 84.5                                    | 85.0                                       |
| $\text{N}_2\text{-Ti}_2\text{-N}_2$  | 105.2                      | 102.6                                   | 102.6                                   | 103.4                                      |
| $\text{T}_1\text{-Ti}_1\text{-T}_1$  | /                          | 99.4                                    | 90.2                                    | 89.6                                       |
| $\text{Ti}_1\text{-T}_1\text{-Ti}_1$ | /                          | 99.4                                    | 87.9                                    | 85.9                                       |
| $\text{T}_1\text{-Ti}_1\text{-T}_2$  | /                          | 111.1                                   | 92.8                                    | 91.5                                       |
| $\text{Ti}_2\text{-T}_2\text{-Ti}_2$ | /                          | 92.8                                    | 86.8                                    | 85.7                                       |
| $\text{T}_2\text{-Ti}_2\text{-T}_2$  | /                          | 84.1                                    | 83.2                                    | 83.1                                       |
| $\text{N}_1\text{-Ti}_1\text{-T}_1$  | /                          | 84.0                                    | 91.2                                    | 91.4                                       |
| $\text{N}_2\text{-Ti}_1\text{-T}_1$  | /                          | 89.9                                    | 92.6                                    | 92.6                                       |
| $\text{N}_2\text{-Ti}_2\text{-T}_2$  | /                          | 85.7                                    | 86.9                                    | 86.5                                       |
| $\text{N}_3\text{-Ti}_2\text{-T}_2$  | /                          | 85.7                                    | 87.7                                    | 88.5                                       |

**Table S3** The permeation barrier of  $\text{Ti}_{12}\text{N}_8\text{T}_{12}$  (T = F, O, OH)

|                                            | $\text{H}_2(\text{meV})$ | $\text{He}(\text{meV})$ | $\text{CH}_4(\text{meV})$ |
|--------------------------------------------|--------------------------|-------------------------|---------------------------|
| $\text{Ti}_{12}\text{N}_8\text{F}_{12}$    | 138                      | 48                      | 940                       |
| $\text{Ti}_{12}\text{N}_8\text{O}_{12}$    | 142                      | 54                      | 1116                      |
| $\text{Ti}_{12}\text{N}_8(\text{OH})_{12}$ | 143                      | 43                      | 850                       |

POSCAR of Ti<sub>12</sub>N<sub>8</sub>O<sub>12</sub>

Ti12N8O12

1.0

|               |              |               |
|---------------|--------------|---------------|
| 8.9134998322  | 0.0000000000 | 0.0000000000  |
| -4.4567499161 | 7.7193172913 | 0.0000000000  |
| 0.0000000000  | 0.0000000000 | 24.4171009064 |

|    |    |   |
|----|----|---|
| Ti | O  | N |
| 12 | 12 | 8 |

Direct

|              |             |             |
|--------------|-------------|-------------|
| 0.553539986  | 0.446460020 | 0.434779992 |
| 0.446460039  | 0.553540030 | 0.565220008 |
| 0.553539994  | 0.107079987 | 0.434779992 |
| 0.446460020  | 0.892920039 | 0.565220008 |
| 0.892920060  | 0.446460020 | 0.434779992 |
| 0.107080005  | 0.553540030 | 0.565220008 |
| 0.778789994  | 0.557590045 | 0.536650009 |
| 0.221210004  | 0.442410004 | 0.463349991 |
| 0.442409979  | 0.221199999 | 0.536650009 |
| 0.557590012  | 0.778800036 | 0.463349991 |
| 0.778800052  | 0.221210006 | 0.536650009 |
| 0.221200019  | 0.778790028 | 0.463349991 |
| 0.562950005  | 0.437050023 | 0.586749985 |
| 0.437049978  | 0.562949996 | 0.413250015 |
| 0.562950002  | 0.125900004 | 0.586749985 |
| 0.437050019  | 0.874099984 | 0.413250015 |
| 0.874099949  | 0.437049992 | 0.586749985 |
| 0.125900005  | 0.562949996 | 0.413250015 |
| 0.773030028  | 0.546049998 | 0.403049995 |
| 0.226970020  | 0.453949990 | 0.596950005 |
| 0.453950009  | 0.226979968 | 0.403049995 |
| 0.546049992  | 0.773020036 | 0.596950005 |
| 0.773020064  | 0.226970022 | 0.403049995 |
| 0.226979964  | 0.773029981 | 0.596950005 |
| 0.341970009  | 0.341970013 | 0.500000000 |
| 0.658030042  | 0.658030036 | 0.500000000 |
| 0.658030048  | 0.000000000 | 0.500000000 |
| 0.341970005  | 0.000000000 | 0.500000000 |
| -0.000000006 | 0.658030036 | 0.500000000 |
| 0.000000004  | 0.341970013 | 0.500000000 |
| 0.666666670  | 0.333333340 | 0.493279977 |
| 0.333333309  | 0.666666617 | 0.506720023 |



POSCAR of Ti<sub>12</sub>N<sub>8</sub>F<sub>12</sub>

Ti12N8F12

1.0

|               |              |               |
|---------------|--------------|---------------|
| 8.9323997498  | 0.0000000000 | 0.0000000000  |
| -4.4661998749 | 7.7356851000 | 0.0000000000  |
| 0.0000000000  | 0.0000000000 | 23.8318996429 |

|   |    |    |
|---|----|----|
| N | Ti | F  |
| 8 | 12 | 12 |

Direct

|              |              |             |
|--------------|--------------|-------------|
| 0.658510021  | 0.658510012  | 0.500000000 |
| 0.341489964  | 0.341489958  | 0.500000000 |
| 0.341489969  | -0.000000000 | 0.500000000 |
| 0.658510031  | -0.000000000 | 0.500000000 |
| -0.000000005 | 0.341489958  | 0.500000000 |
| -0.000000009 | 0.658510012  | 0.500000000 |
| 0.333333344  | 0.666666688  | 0.502960036 |
| 0.666666603  | 0.333333313  | 0.497039964 |
| 0.221369960  | 0.778629972  | 0.460660008 |
| 0.778630018  | 0.221369983  | 0.539340032 |
| 0.221369983  | 0.442739966  | 0.460660008 |
| 0.778630018  | 0.557260036  | 0.539340032 |
| 0.557259986  | 0.778629972  | 0.460660008 |
| 0.442739965  | 0.221369983  | 0.539340032 |
| 0.439590008  | 0.879189998  | 0.552279996 |
| 0.560410004  | 0.120809972  | 0.447720004 |
| 0.120809969  | 0.560399978  | 0.552279996 |
| 0.879190005  | 0.439600023  | 0.447720004 |
| 0.439600025  | 0.560410026  | 0.552279996 |
| 0.560399991  | 0.439590006  | 0.447720004 |
| 0.224930026  | 0.775070006  | 0.602779969 |
| 0.775069967  | 0.224929980  | 0.397220031 |
| 0.224929980  | 0.449859959  | 0.602779969 |
| 0.775069990  | 0.550139980  | 0.397220031 |
| 0.550140034  | 0.775070006  | 0.602779969 |
| 0.449859967  | 0.224929995  | 0.397220031 |
| 0.441549983  | 0.883109949  | 0.403400012 |
| 0.558449971  | 0.116890014  | 0.596599988 |
| 0.116889997  | 0.558439972  | 0.403400012 |
| 0.883109948  | 0.441559998  | 0.596599988 |
| 0.441559999  | 0.558449958  | 0.403400012 |
| 0.558439971  | 0.441549982  | 0.596599988 |

POSCAR of Ti<sub>12</sub>N<sub>8</sub>(OH)<sub>12</sub>

Ti12N8O12H12

1.0

|               |              |               |
|---------------|--------------|---------------|
| 9.0165004730  | 0.0000000000 | 0.0000000000  |
| -4.5082502365 | 7.8085184629 | 0.0000000000  |
| 0.0000000000  | 0.0000000000 | 26.5926990509 |

|   |    |    |    |
|---|----|----|----|
| N | Ti | O  | H  |
| 8 | 12 | 12 | 12 |

Direct

|             |             |             |
|-------------|-------------|-------------|
| 0.657589953 | 0.657589954 | 0.500000000 |
| 0.342410030 | 0.342410039 | 0.500000000 |
| 0.342410021 | 0.000000000 | 0.500000000 |
| 0.657589953 | 0.000000000 | 0.500000000 |
| 0.000000009 | 0.342410039 | 0.500000000 |
| 0.000000001 | 0.657589954 | 0.500000000 |
| 0.333333331 | 0.666666662 | 0.503700017 |
| 0.666666650 | 0.333333301 | 0.496299983 |
| 0.222299986 | 0.777699994 | 0.465349991 |
| 0.777700037 | 0.222299999 | 0.534649973 |
| 0.222299999 | 0.444599998 | 0.465349991 |
| 0.777699998 | 0.555399996 | 0.534649973 |
| 0.555399982 | 0.777699994 | 0.465349991 |
| 0.444600015 | 0.222299999 | 0.534649973 |
| 0.440519976 | 0.881039953 | 0.546740002 |
| 0.559480013 | 0.118960025 | 0.453259998 |
| 0.118960023 | 0.559480017 | 0.546740002 |
| 0.881039961 | 0.440519976 | 0.453259998 |
| 0.440519981 | 0.559480017 | 0.546740002 |
| 0.559480016 | 0.440519976 | 0.453259998 |
| 0.222409993 | 0.777589953 | 0.594690033 |
| 0.777590049 | 0.222410025 | 0.405309967 |
| 0.222410025 | 0.444820050 | 0.594690033 |
| 0.777589987 | 0.555179974 | 0.405309967 |
| 0.555179938 | 0.777590014 | 0.594690033 |
| 0.444820066 | 0.222409994 | 0.405309967 |
| 0.441669997 | 0.883329999 | 0.412939986 |
| 0.558329981 | 0.116670009 | 0.587059978 |
| 0.116670013 | 0.558340032 | 0.412939986 |
| 0.883329999 | 0.441659992 | 0.587059978 |
| 0.441660013 | 0.558330017 | 0.412939986 |
| 0.558340025 | 0.441670007 | 0.587059978 |
| 0.236540009 | 0.763459949 | 0.630249975 |
| 0.763459973 | 0.236540014 | 0.369750025 |

|             |             |             |
|-------------|-------------|-------------|
| 0.236540014 | 0.473080027 | 0.630249975 |
| 0.763459983 | 0.526919966 | 0.369750025 |
| 0.526919967 | 0.763459949 | 0.630249975 |
| 0.473080033 | 0.236539998 | 0.369750025 |
| 0.441839995 | 0.883689985 | 0.376490014 |
| 0.558160024 | 0.116310001 | 0.623510022 |
| 0.116309988 | 0.558149993 | 0.376490014 |
| 0.883689956 | 0.441850000 | 0.623510022 |
| 0.441850011 | 0.558160008 | 0.376490014 |
| 0.558150012 | 0.441839985 | 0.623510022 |
